# Supplementary material for: Vertebrate myosin 1d regulates left–right organizer morphogenesis and laterality
Source: PubMed Central journal article supplement (PMC6107537; doi:10.1038/s41467-018-05866-2), 2018-08-23
Supplement: 41467_2018_5866_MOESM3_ESM.pdf [file 41467_2018_5866_MOESM3_ESM.pdf]

## Description of Additional Supplementary Files

**File Name:** Supplementary Movie 1

**Description:** Time lapse representative movie showing lumen expansion from 3-8 S stage in *Tg(dusp6:GFP-MA)* embryo.

**File Name:** Supplementary Movie 2

**Description:** Time lapse representative movie showing lumen expansion at 3-8 S stage in *myo1d* MO injected into *Tg(dusp6:GFP-MA)* embryo.

**File Name:** Supplementary Movie 3

**Description:** Time lapse representative movie showing FITC fluorescent microbead movement in wildtype control at 8S. DIC images merged with FITC channel.

**File Name:** Supplementary Movie 4

**Description:** Time lapse representative movie showing FITC fluorescent microbead movement in *myo1d* MZ embryo at 8S. DIC images merged with FITC channel.

**File Name:** Supplementary Movie 5

**Description:** Confocal movie showing vacuolar transport in KV epithelial cells from a *Tg(dusp6:GFP-MA)* embryo at 3S stage.

**File Name:** Supplementary Movie 6

**Description:** Confocal movie showing vacuolar transport in KV epithelial cells from a *myo1d* MZ;*Tg(dusp6:GFP-MA)* embryo at 3S stage.

**File Name:** Supplementary Movie 7

**Description:** Representative 4D STED movie showing vacuolar transport across KV epithelial cells in a *Tg(dusp6:GFP-MA)* embryo. L-lumen

**File Name:** Supplementary Movie 8

**Description:** Representative 4D STED movie showing vacuolar transport across KV epithelial cells in *myo1d* MZ;*Tg(dusp6:GFP-MA)* embryo. Note vacuolar size is larger than in wildtype embryo show in Supplementary Movie 7. L-lumen

**File Name:** Supplementary Movie 9

**Description:** 3D reconstructed movie showing posterior KV epithelial cells between 2-3 S stage in a *Tg(dusp6:GFP-MA)* embryo.

**File Name:** Supplementary Movie 10

**Description:** 3D reconstructed movie showing presence of large vacuoles in posterior KV epithelial cells at 2-3 S stage in *myo1d* MZ;*Tg(dusp6:GFP-MA)* embryos.
